# Supplementary material for: Copper(I)-binding properties of de-coppering drugs for the treatment of Wilson disease. α-Lipoic acid as a potential anti-copper agent
Source: PubMed Central journal article supplement (PMC5780470; doi:10.1038/s41598-018-19873-2), 2018-01-23
Supplement: 41598_2018_19873_MOESM1_ESM.pdf [file 41598_2018_19873_MOESM1_ESM.pdf]

# **Copper(I)-binding properties of de-coppering drugs for the treatment of Wilson disease**

**Julia Smirnova<sup>†</sup>, Ekaterina Kabin<sup>†</sup>, Ivar Järving<sup>†</sup>, Olga Bragina<sup>†</sup>, Vello Tõugu<sup>†</sup>, Thomas Plitz<sup>‡</sup> and Peep Palumaa<sup>†,\*</sup>**

<sup>†</sup>Department of Chemistry and Biotechnology, Tallinn University of Technology, Akadeemia tee 15, 12618 Tallinn, Estonia

<sup>‡</sup>Wilson Therapeutics AB, Västra Kungsgatan 3, S-111 43 Stockholm, Sweden

\* Corresponding author: E-mail: [peep.palumaa@ttu.ee](mailto:peep.palumaa@ttu.ee), Tel +372 5025559, Fax: +372 6204401

## **SUPPLEMENTARY INFORMATION**

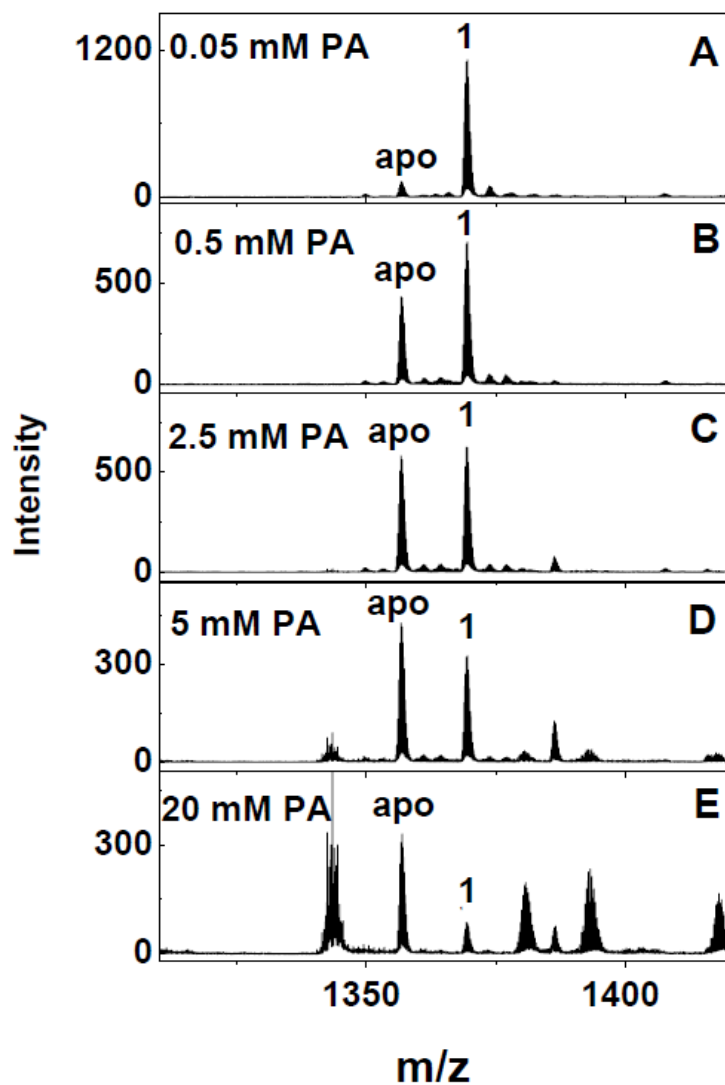

**Fig. S1.** Determination of the relative Cu(I)-binding affinity of PA in competition with Cu<sub>1</sub>Cox<sub>17</sub>.

ESI-MS spectra of Cu<sub>1</sub>Cox<sub>17</sub> in the presence of 1  $\mu$ M – 20 mM PA. Conditions: Cox<sub>17</sub> 1  $\mu$ M; 20 mM ammonium acetate, pH=7.3, DTT 50  $\mu$ M; T=25°C. Ions with a charge state +5 are shown; numbers on the peaks denote the metal stoichiometry of the complex.

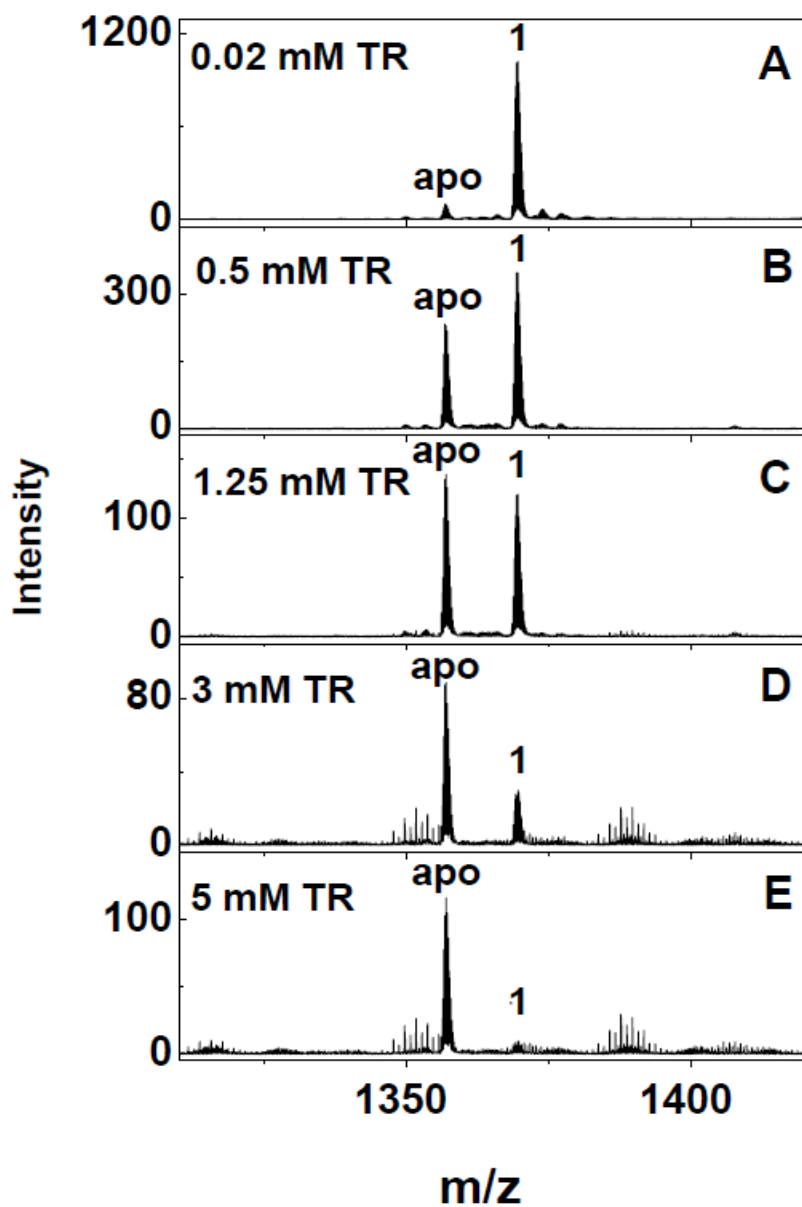

**Fig. S2.** Determination of the relative Cu(I)-binding affinity of TR in competition with Cu<sub>1</sub>Cox17.

ESI-MS spectra of Cu<sub>1</sub>Cox17 in the presence of 1  $\mu$ M – 5 mM TR. Conditions: Cox17 1  $\mu$ M; 20 mM ammonium acetate, pH=7.3, DTT 50  $\mu$ M; T=25°C. Ions with a charge state +5 are shown; numbers on the peaks denote the metal stoichiometry of the complex.

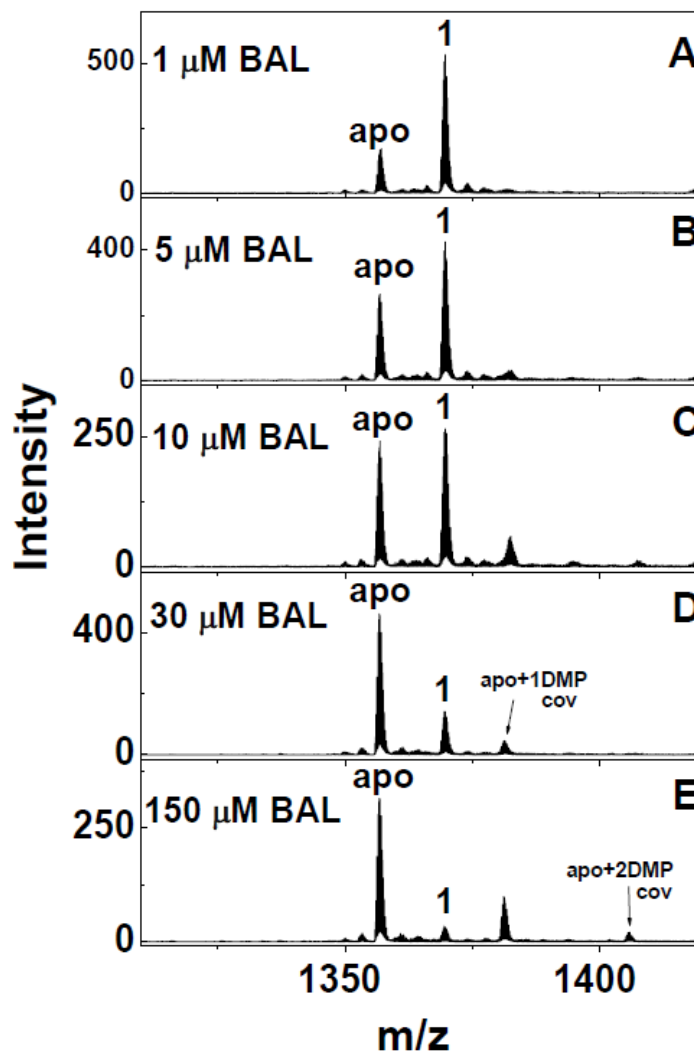

**Fig. S3.** Determination of the relative Cu(I)-binding affinity of BAL in competition with Cu<sub>1</sub>Cox<sub>17</sub>.

ESI-MS spectra of Cu<sub>1</sub>Cox<sub>17</sub> in the presence of 1 – 150 μM BAL. Conditions: Cox<sub>17</sub> 1 μM; 20 mM ammonium acetate, pH=7.3, DTT 50 μM; T=25°C. Ions with a charge state +5 are shown; numbers on the peaks denote the metal stoichiometry of the complex.

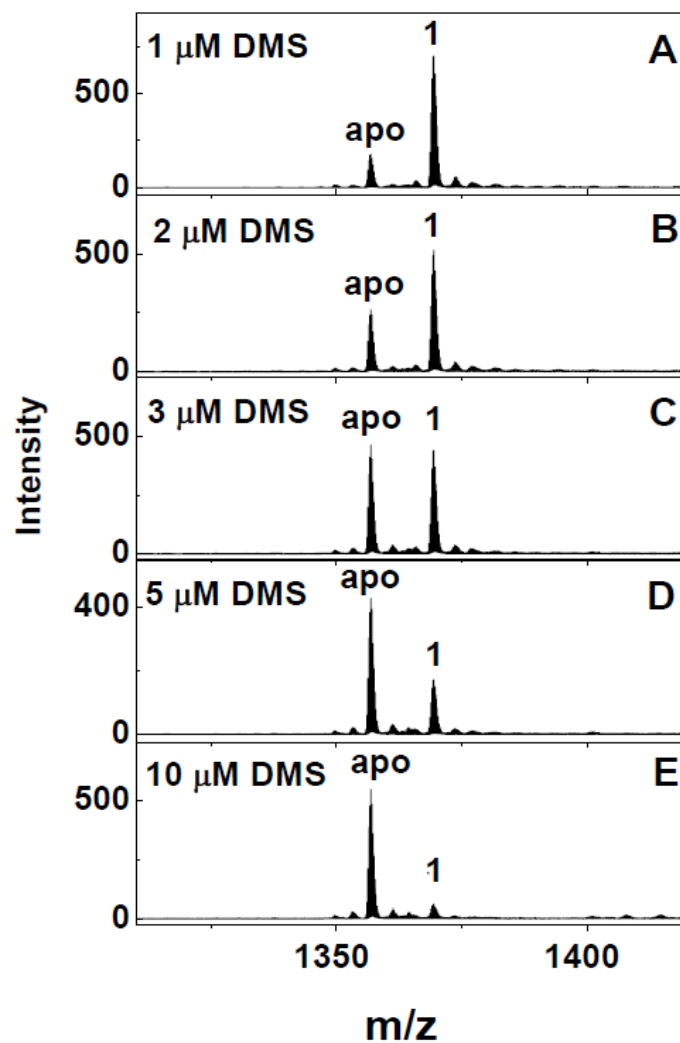

**Fig. S4.** Determination of the relative Cu(I)-binding affinity of DMS in competition with Cu<sub>1</sub>Cox17.

ESI-MS spectra of Cu<sub>1</sub>Cox17 in the presence of 1 μM – 15 μM DMS. Conditions: Cox17 1 μM; 20 mM ammonium acetate, pH=7.3, DTT 50 μM; T=25°C. Ions with a charge state +5 are shown; numbers on the peaks denote the metal stoichiometry of the complex.

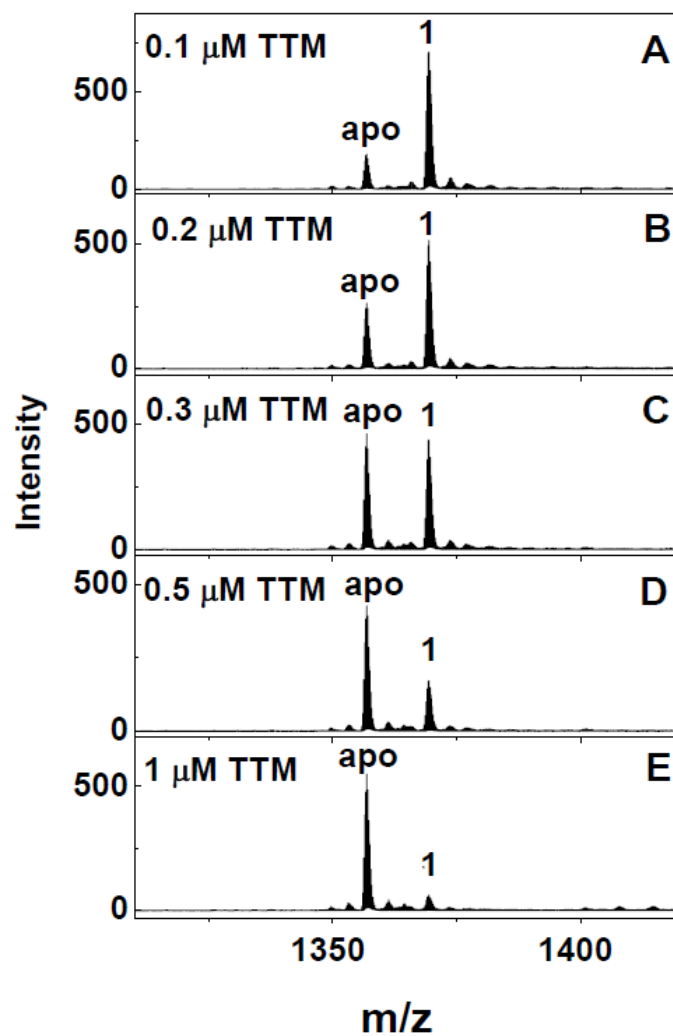

**Fig. S5.** Determination of the relative Cu(I)-binding affinity of ammonium TTM and bis-choline TTM in competition with Cu<sub>1</sub>Cox17.

ESI-MS spectra of Cu<sub>1</sub>Cox17 in the presence of 0.1 – 2.5 μM ammonium TTM. Conditions: Cox17 1 μM; 20 mM ammonium acetate, pH=7.3, DTT 50 μM; T=25°C. Ions with a charge state +5 are shown; numbers on the peaks denote the metal stoichiometry of the complex.

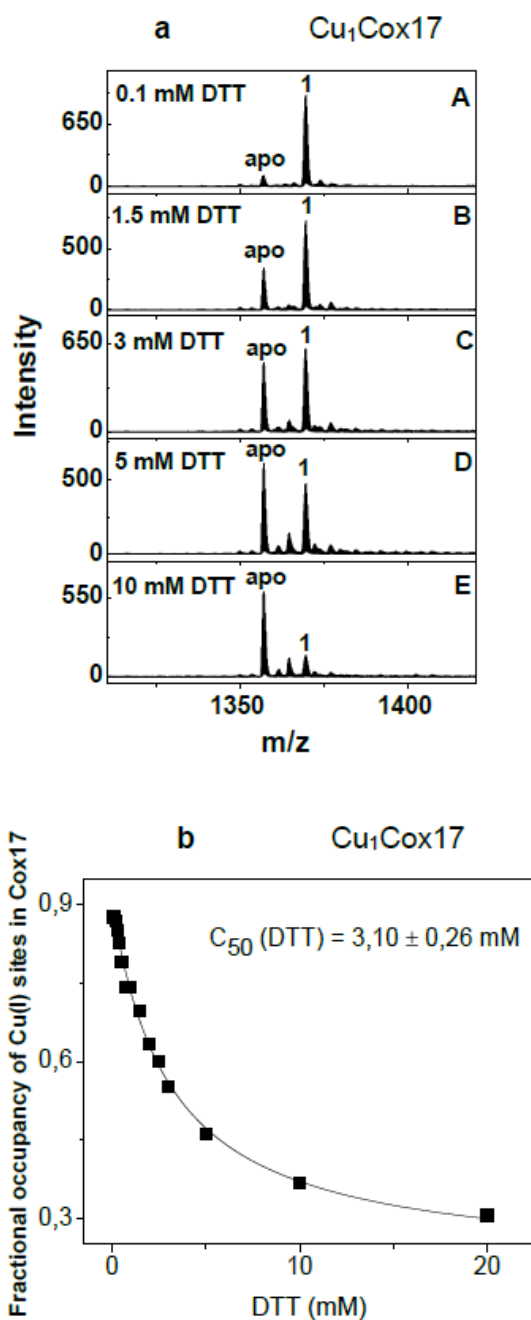

**Fig. S6.** Determination of the relative Cu(I)-binding affinity of DTT in competition with  $\text{Cu}_1\text{Cox17}$ .

(a) ESI-MS spectra of  $\text{Cu}_1\text{Cox17}$  in the presence of 0.1 – 10 mM DTT. Conditions: Cox17 1  $\mu\text{M}$ ; 20 mM ammonium acetate, pH=7.3, DTT 50  $\mu\text{M}$ ; T=25°C. Ions with a charge state +5 are shown; numbers on the peaks denote the metal stoichiometry of the complex. (b) Fractional occupancy of Cu(I)-binding sites in Cox17 at different concentrations of DTT in a metal competition experiment. The solid line shows the fitting curve with hyperbolic equation ( $y=P1*[1-(x/[P2+x])] + P3$ ), where  $P2 = C_{50}$ .

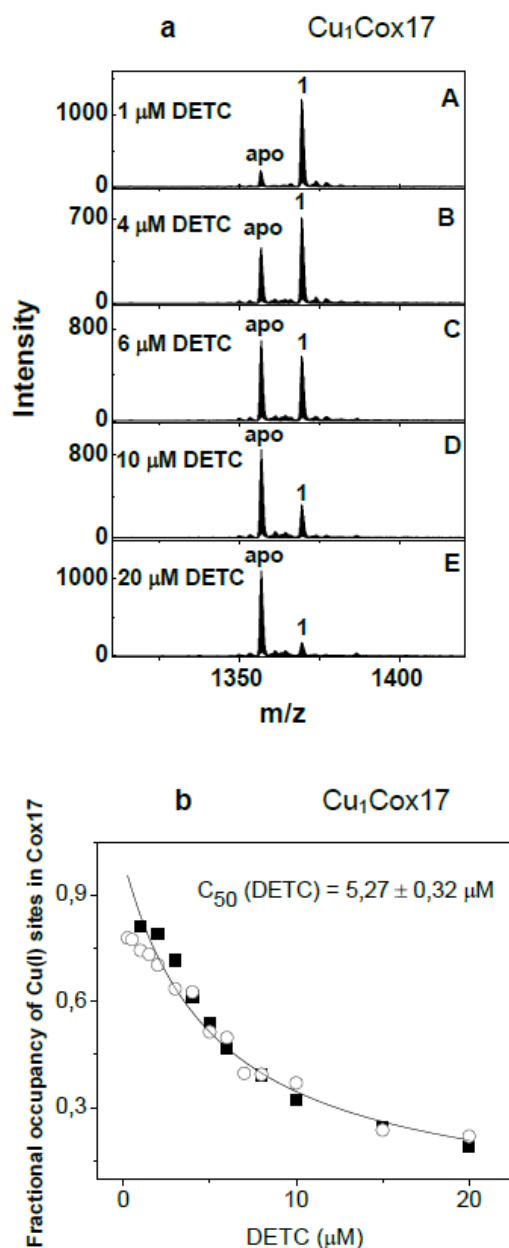

**Fig. S7.** Determination of the relative Cu(I)-binding affinity of DETC in competition with  $\text{Cu}_1\text{Cox17}$ .

(a) ESI-MS spectra of  $\text{Cu}_1\text{Cox17}$  in the presence of 1 – 20  $\mu\text{M}$  DETC. Conditions: Cox17 1  $\mu\text{M}$ ; 20 mM ammonium acetate,  $\text{pH}=7.3$ , DTT 50  $\mu\text{M}$ ;  $T=25^\circ\text{C}$ . Ions with a charge state +5 are shown; numbers on the peaks denote the metal stoichiometry of the complex. (b) Fractional occupancy of Cu(I)-binding sites in Cox17 at different concentrations of DETC in a metal competition experiment. Results of duplicate experiments are presented with different symbols. The solid line shows the fitting curve with hyperbolic equation ( $y= P1*[1-(x/[P2+x])]+P3$ ), where  $P2 = C_{50}$ .



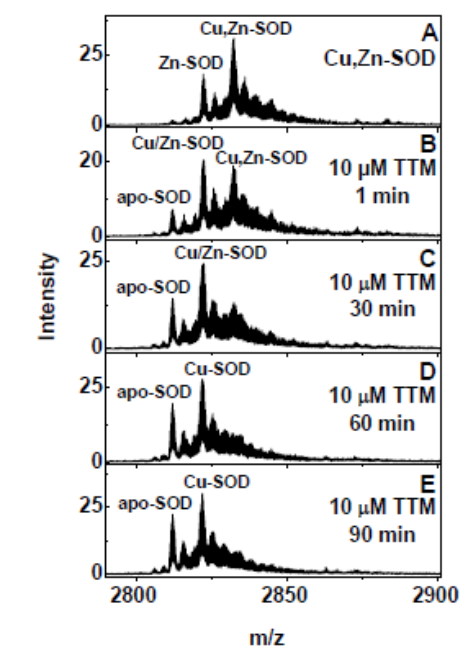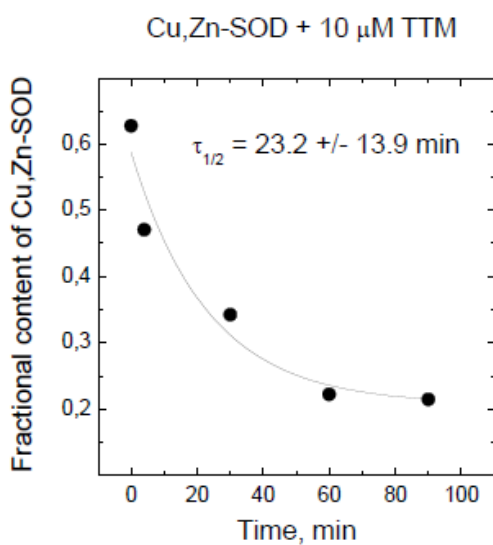

**Fig. S8.** Dissociation of Cu(I) ions from Cu,Zn-SOD by the influence of TTM.

(a) ESI-MS spectra of 5  $\mu\text{M}$  Cu,Zn-SOD 2a in the presence of 10  $\mu\text{M}$  TTM. Conditions: 20 mM ammonium acetate, pH=7.3, DTT 10 mM; T=25°C. Ions with a charge state +6 are shown; (b) Demetallation kinetics of 5  $\mu\text{M}$  Cu,Zn-SOD by the influence of 10  $\mu\text{M}$  TTM.

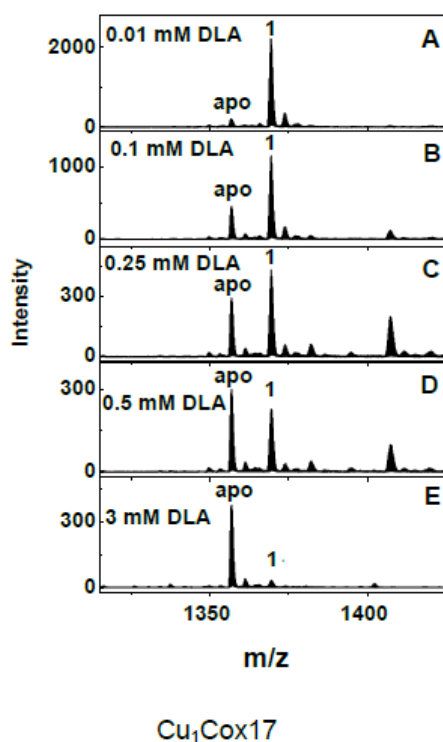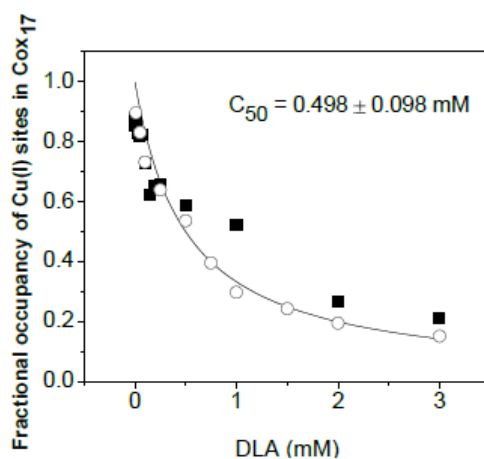

**Fig. S9.** Determination of the relative Cu(I)-binding affinity of DLA in competition with Cu<sub>1</sub>Cox<sub>17</sub>.

(a) ESI-MS spectra of Cu<sub>1</sub>Cox<sub>17</sub> in the presence of 1 μM – 3 mM DLA. Conditions: Cox<sub>17</sub> 1 μM; 20 mM ammonium acetate, pH=7.3, DTT 50 μM; T=25°C. Ions with a charge state +5 are shown; numbers on the peaks denote the metal stoichiometry of the complex. (b) Fractional occupancy of Cu(I)-binding sites in Cox<sub>17</sub> at different concentrations of DMS in a metal competition experiment. Results of duplicate experiments are presented with different symbols. The solid line shows the fitting curve with hyperbolic equation ( $y = P1 * [1 - (x / [P2 + x])] + P3$ ), where  $P2 = C_{50}$ .
